# Supplementary material for: Preterm Infants Harbour a Rapidly Changing Mycobiota That Includes Candida Pathobionts
Source: MDPI journal article supplement (doi:10.3390/jof6040273), 2020-11-09
Supplement: s1 [file s1]

**Table S7.** Relative abundance values of *Debaryomyces hansenii* and *Saccharomyces cerevisiae* at 6-, 12- and 18-months.

| Infant Sample: | <i>D. hansenii</i> | <i>S. cerevisiae</i> |
|----------------|--------------------|----------------------|
| F1_06          | 5.24               | 0.50                 |
| M1_06          | 0.00               | 0.00                 |
| F2_06          | 0.00               | 0.00                 |
| F3_06          | 0.00               | 0.00                 |
| M3_06          | 11.71              | 0.92                 |
| F4_06          | 0.00               | 0.00                 |
| F5_06          | 0.00               | 0.37                 |
| M5_06          | 0.00               | 0.00                 |
| M6_06          | 2.17               | 0.00                 |
| F1_12          | 99.37              | 0.00                 |
| M1_12          | 0.74               | 73.33                |
| M2_12          | 0.00               | 0.00                 |
| F2_12          | 0.65               | 0.82                 |
| F3_12          | 40.16              | 15.72                |
| M3_12          | 0.00               | 9.58                 |
| F4_12          | 0.00               | 0.00                 |
| M4_12          | 0.03               | 0.00                 |
| F5_12          | 0.00               | 64.91                |
| M5_12          | 0.00               | 0.00                 |
| M6_12          | 0.12               | 51.53                |
| F1_18          | 5.01               | 0.98                 |
| M1_18          | 1.39               | 0.00                 |
| M2_18          | 0.00               | 0.05                 |
| F3_18          | 0.02               | 95.85                |
| M3_18          | 4.23               | 0.09                 |
| M4_18          | 0.00               | 0.01                 |
| F5_18          | 0.00               | 0.00                 |
| M5_18          | 0.00               | 0.00                 |
| M6_18          | 2.09               | 3.23                 |

**Mean relative abundance:**

*D. hansenii* : 2.13%

*S. cerevisiae* : 0.2%

**Mean relative abundance:**

*D. hansenii* : 12.82%

*S. cerevisiae* : 19.63%

**Mean relative abundance:**

*D. hansenii* : 1.42%

*S. cerevisiae* : 11.13%
