# Supplementary material for: Preterm Infants Harbour a Rapidly Changing Mycobiota That Includes Candida Pathobionts
Source: MDPI journal article supplement (doi:10.3390/jof6040273), 2020-11-09
Supplement: s1 [file s1]

**Table S5.** Most abundant fungal species.

| Species*                            | Category         | Mean abundance (%) | Prevalence (%)** |
|-------------------------------------|------------------|--------------------|------------------|
| <i>Baeospora myosura</i>            | Environmental    | 19.75              | 93.1             |
| <i>Candida parapsilosis</i> (Y)     | Human-associated | 13.28              | 89.7             |
| <i>Saccharomyces cerevisiae</i> (Y) | Food-related     | 10.96              | 51.7             |
| <i>Candida albicans</i> (Y)         | Human-associated | 10.89              | 65.5             |
| <i>Debaryomyces hansenii</i> (Y)    | Food-related     | 5.96               | 48.3             |
| <i>Davidiellaa tassiana</i>         | Plant pathogen   | 5.50               | 79.3             |
| <i>Naganishia diffluens</i> (Y)     | Human-associated | 2.82               | 27.6             |
| <i>Candida metapsilosis</i> (Y)     | Human-associated | 2.42               | 13.8             |
| <i>Penicillium polonicum</i>        | Plant pathogen   | 2.15               | 24.1             |
| <i>Pleurotheciella rivularia</i>    | Environmental    | 1.99               | 10.3             |

\* (Y), denotes a yeast species

\*\* n = 29
