# Supplementary material for: Preterm Infants Harbour a Rapidly Changing Mycobiota That Includes Candida Pathobionts
Source: MDPI journal article supplement (doi:10.3390/jof6040273), 2020-11-09
Supplement: s1 [file s1]

**Table S2.** Number of fungal taxa detected in each infant faecal sample.

| Infant:     | Sample:        |                 |                 |
|-------------|----------------|-----------------|-----------------|
|             | 6-month (X_06) | 12-month (X_12) | 18-month (X_18) |
| F1          | 23             | 5               | 31              |
| F2          | 12             | 10              | N/A             |
| F3          | 7              | 13              | 20              |
| F4          | 8              | 20              | N/A             |
| F5          | 7              | 14              | 28              |
| M1          | 28             | 37              | 12              |
| M2          | N/A            | 18              | 10              |
| M3          | 15             | 11              | 14              |
| M4          | N/A            | 5               | 12              |
| M5          | 5              | 9               | 12              |
| M6          | 16             | 28              | 27              |
| <b>Mean</b> | <b>13.4</b>    | <b>15.5</b>     | <b>18.4</b>     |

N/A, Sample unavailable.

**Note:** Only taxa with relative abundance values of 0.01% or greater were accepted (i.e. detection threshold cut-off).

Overall mean (all samples): **15.8**
