# Supplementary material for: Preterm Infants Harbour a Rapidly Changing Mycobiota That Includes Candida Pathobionts
Source: MDPI journal article supplement (doi:10.3390/jof6040273), 2020-11-09
Supplement: s1 [file s1]

**Table S6.** Persistent fungal species, re-occurring in 2 or more infant longitudinal samples.

| Species*                          | Category**                     | Grows at 37C | Infant |    |    |    |    |    |    |    |    |    |    |
|-----------------------------------|--------------------------------|--------------|--------|----|----|----|----|----|----|----|----|----|----|
|                                   |                                |              | F1     | F2 | F3 | F4 | F5 | M1 | M2 | M3 | M4 | M5 | M6 |
| <i>Aspergillus ruber</i>          | Environmental                  | +            |        |    |    |    |    |    |    |    |    |    |    |
| <i>Aspergillus subservicolor</i>  | Environmental                  | -            |        |    |    |    |    |    |    |    |    |    |    |
| <i>Baeospora myosura</i>          | Environmental                  | -            |        |    |    |    |    |    |    |    |    |    |    |
| <i>Candida albicans</i>           | Human-associated               | +            |        |    |    |    |    |    |    |    |    |    |    |
| <i>Candida parapsilosis</i>       | Human-associated               | +            |        |    |    |    |    |    |    |    |    |    |    |
| <i>Candida tropicalis</i>         | Human-associated               | +            |        |    |    |    |    |    |    |    |    |    |    |
| <i>Davidiella tassiana</i>        | Plant pathogen                 | -            |        |    |    |    |    |    |    |    |    |    |    |
| <i>Debaryomyces hansenii</i>      | Food-related                   | v            |        |    |    |    |    |    |    |    |    |    |    |
| <i>Filobasidium magnum</i>        | Environmental                  | -            |        |    |    |    |    |    |    |    |    |    |    |
| <i>Hypholoma fasciculare</i>      | Environmental                  | -            |        |    |    |    |    |    |    |    |    |    |    |
| <i>Malassezia restricta</i>       | Human-associated               | v            |        |    |    |    |    |    |    |    |    |    |    |
| <i>Meyerozyma guilliermondii</i>  | Human-associated               | +            |        |    |    |    |    |    |    |    |    |    |    |
| <i>Monilinia laxa</i>             | Plant pathogen                 | -            |        |    |    |    |    |    |    |    |    |    |    |
| <i>Naganishia diffluens</i>       | Environmental/Human-associated | -            |        |    |    |    |    |    |    |    |    |    |    |
| <i>Penicillium astrolabium</i>    | Environmental                  | -            |        |    |    |    |    |    |    |    |    |    |    |
| <i>Penicillium glabrum</i>        | Plant pathogen                 | -            |        |    |    |    |    |    |    |    |    |    |    |
| <i>Penicillium polonicum</i>      | Plant pathogen                 | -            |        |    |    |    |    |    |    |    |    |    |    |
| <i>Periconia cookei</i>           | Plant pathogen                 | ?            |        |    |    |    |    |    |    |    |    |    |    |
| <i>Rhodotorula mucilaginosa</i>   | Environmental/Human-associated | -            |        |    |    |    |    |    |    |    |    |    |    |
| <i>Saccharomyces cerevisiae</i>   | Food-related                   | v            |        |    |    |    |    |    |    |    |    |    |    |
| <i>Talaromyces infraolivaceus</i> | Environmental                  | -            |        |    |    |    |    |    |    |    |    |    |    |
| <i>Vishniacozyma carnescens</i>   | Environmental                  | -            |        |    |    |    |    |    |    |    |    |    |    |
| <i>Wickerhamomyces onychis</i>    | Human-associated               | +            |        |    |    |    |    |    |    |    |    |    |    |

\* Opportunistic human pathogens are shown in red.

Present in 2 or more longitudinal samples

\*\* *N. diffluens* , skin commensal (occasional); *Rh. mucilaginosa* , gut commensal (putative).
