# Supplementary figures and images for: Preterm Infants Harbour a Rapidly Changing Mycobiota That Includes Candida Pathobionts
Source: MDPI journal article supplement (doi:10.3390/jof6040273), 2020-11-09

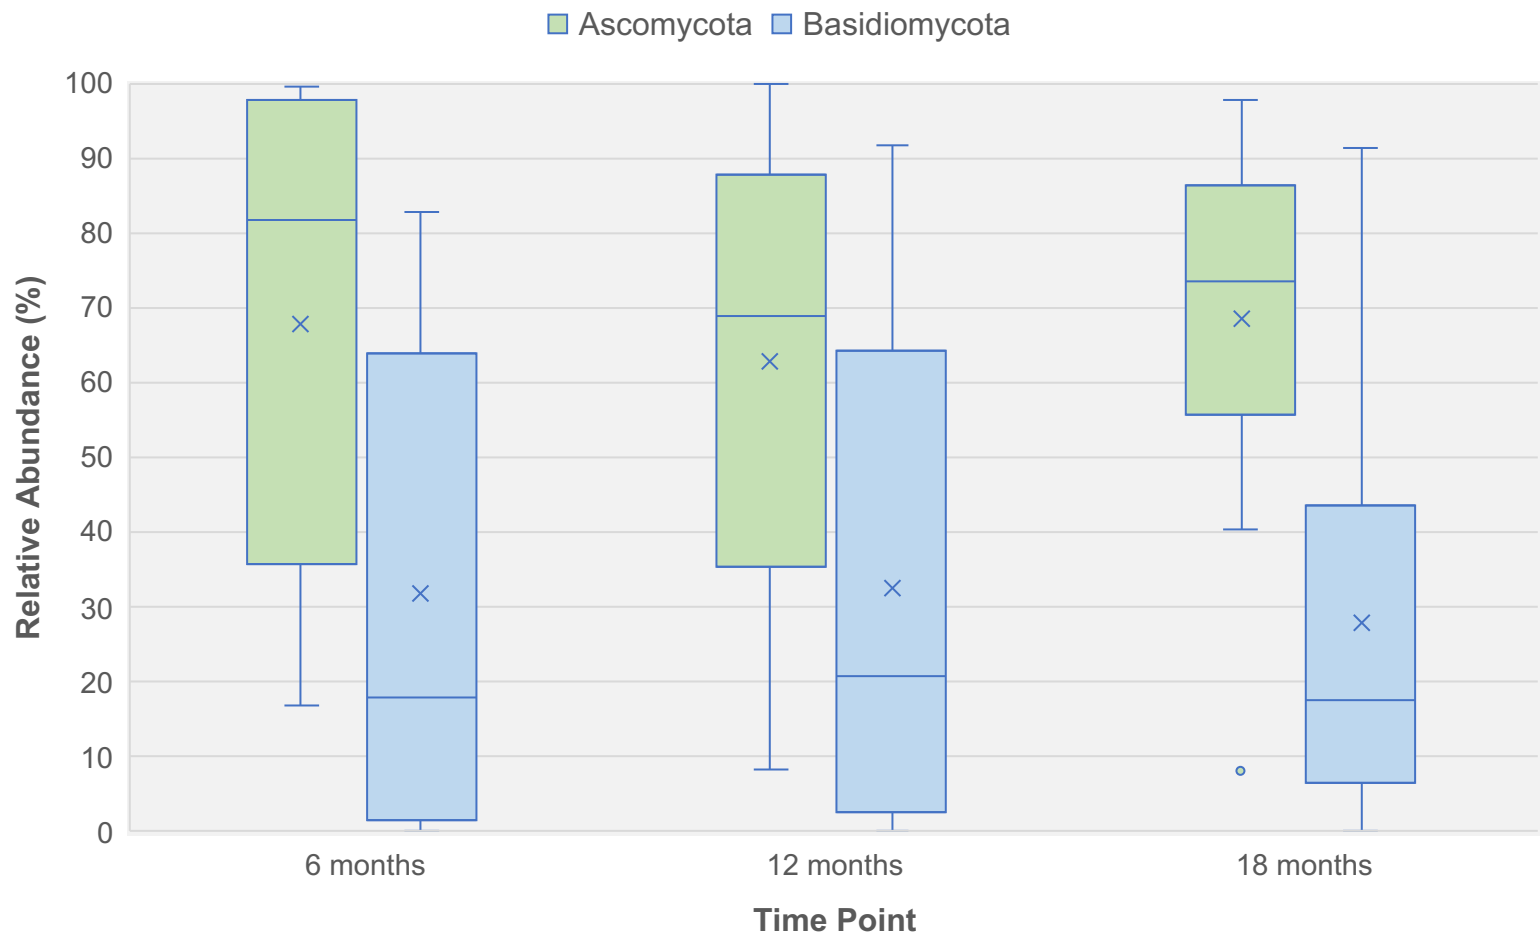

Supplement: s1 [file s1]

Alpha-diversity Index: Shannon

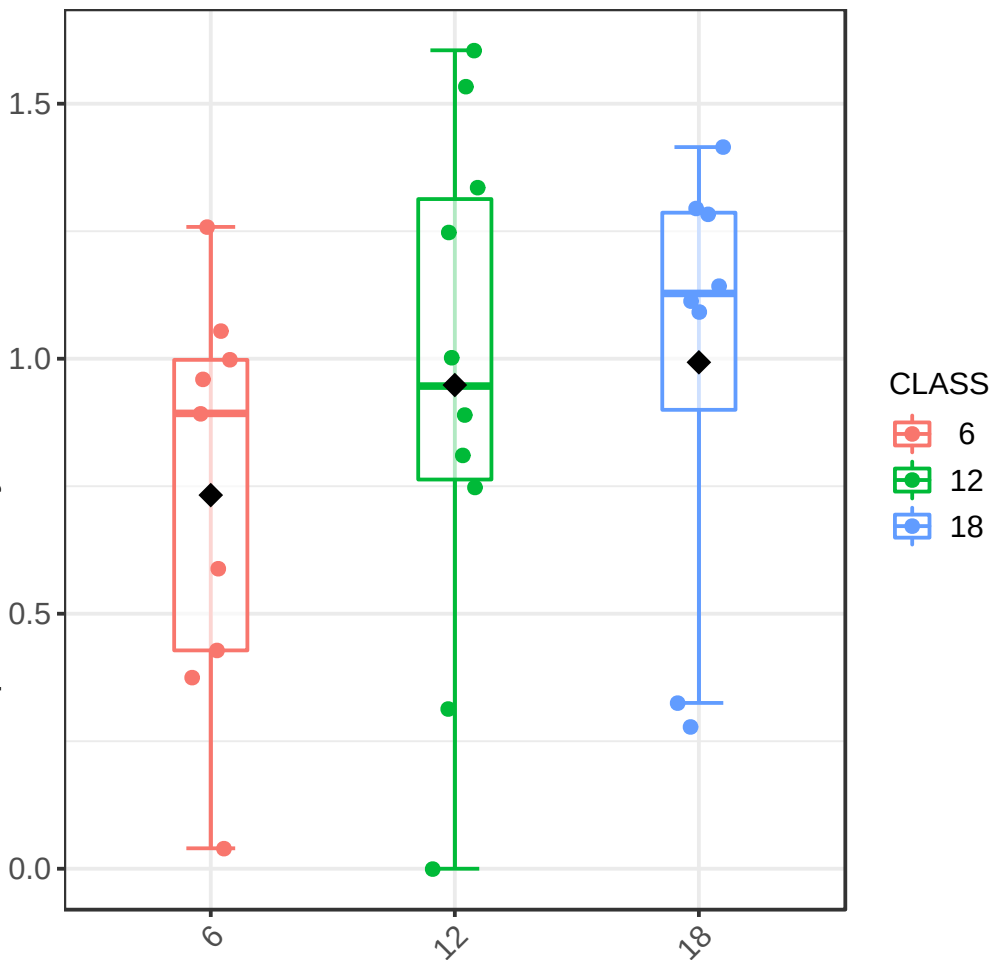

Supplement: s1 [file s1]

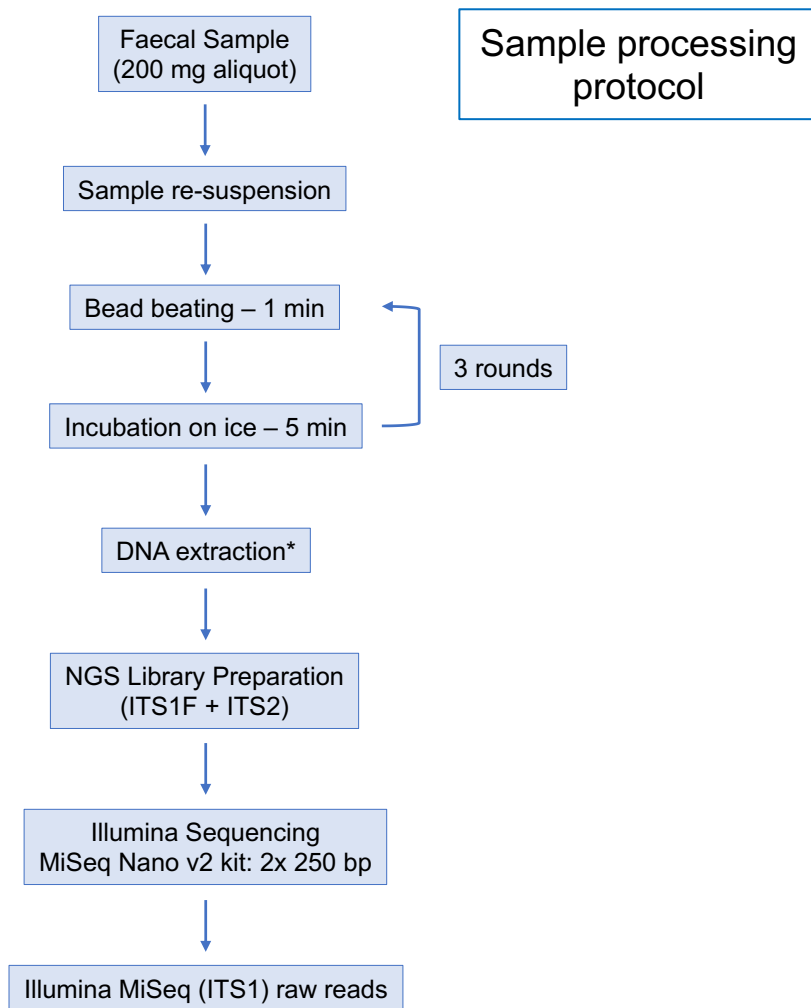

\*Using the MP FastDNA Spin kit for Soil

## Bioinformatics pipeline

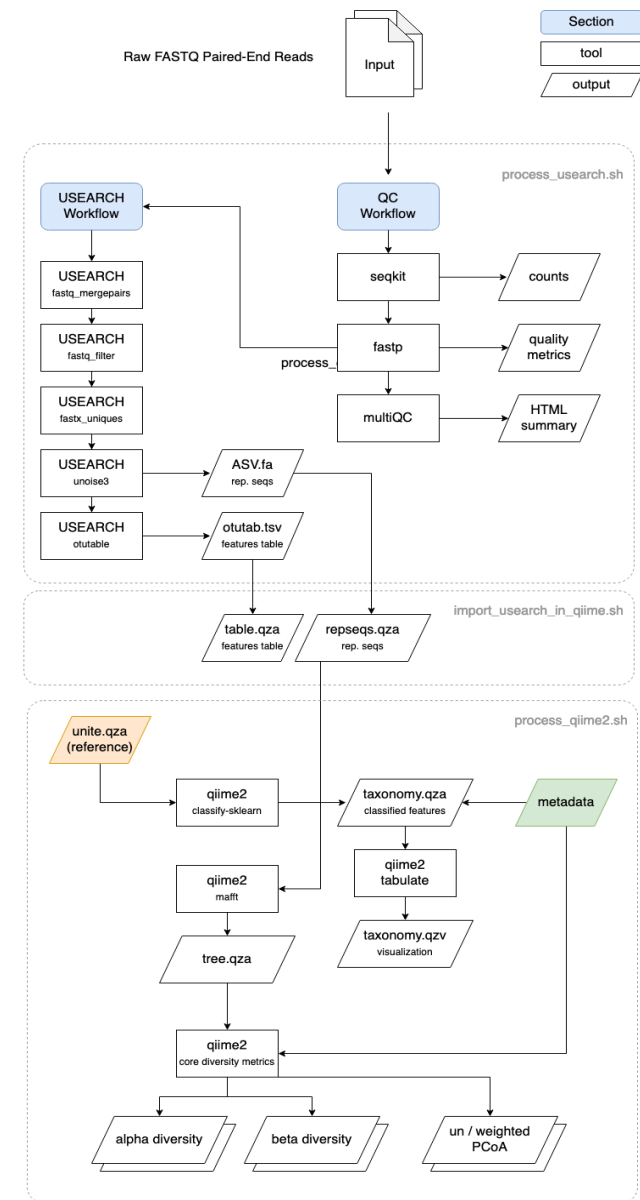

Supplement: s1 [file s1]
